# Supplementary material
Source: PubMed Central journal article supplement (PMC4171186)
Supplement: NIHMS616542-supplement-01.pdf [file NIHMS616542-supplement-01.pdf]

## Appendix Supplementary data

**Appendix 1.** Demographic characteristics of the Ohio Army National Guard Study participants, compared to the Ohio National Guard population

|                            | Study sample |       | Ohio National Guard, 2008–2009 |       | <i>p</i> -value <sup>1</sup> |
|----------------------------|--------------|-------|--------------------------------|-------|------------------------------|
|                            | N            | %     | N                              | %     |                              |
| <b>Age</b>                 |              |       |                                |       | <0.01                        |
| 17–24                      | 878          | 33.64 | 4043                           | 37.50 |                              |
| 25–34                      | 848          | 32.49 | 3746                           | 34.80 |                              |
| 35–44                      | 634          | 24.29 | 2143                           | 19.90 |                              |
| 45+                        | 250          | 9.58  | 846                            | 7.80  |                              |
| <b>Sex</b>                 |              |       |                                |       | 0.16                         |
| Female                     | 388          | 14.83 | 1485                           | 13.80 |                              |
| Male                       | 2228         | 85.17 | 9293                           | 86.20 |                              |
| <b>Race</b>                |              |       |                                |       | <0.01                        |
| Non-Hispanic white         | 2295         | 87.80 | 9512                           | 88.30 |                              |
| Non-Hispanic black         | 195          | 7.50  | 1083                           | 10.00 |                              |
| Other                      | 123          | 4.70  | 183                            | 1.70  |                              |
| <b>Marital status</b>      |              |       |                                |       |                              |
| Married                    | 1227         | 47.00 | 4154                           | 38.50 | <0.01                        |
| Divorced/separated/widowed | 252          | 9.60  | 657                            | 6.10  |                              |
| Never married              | 1134         | 43.40 | 5967                           | 55.40 |                              |

<sup>1</sup>*p*-value from chi-square test comparing ONG population to study sample

**Appendix 2.** Flow diagram for the selection of the final analytic sample

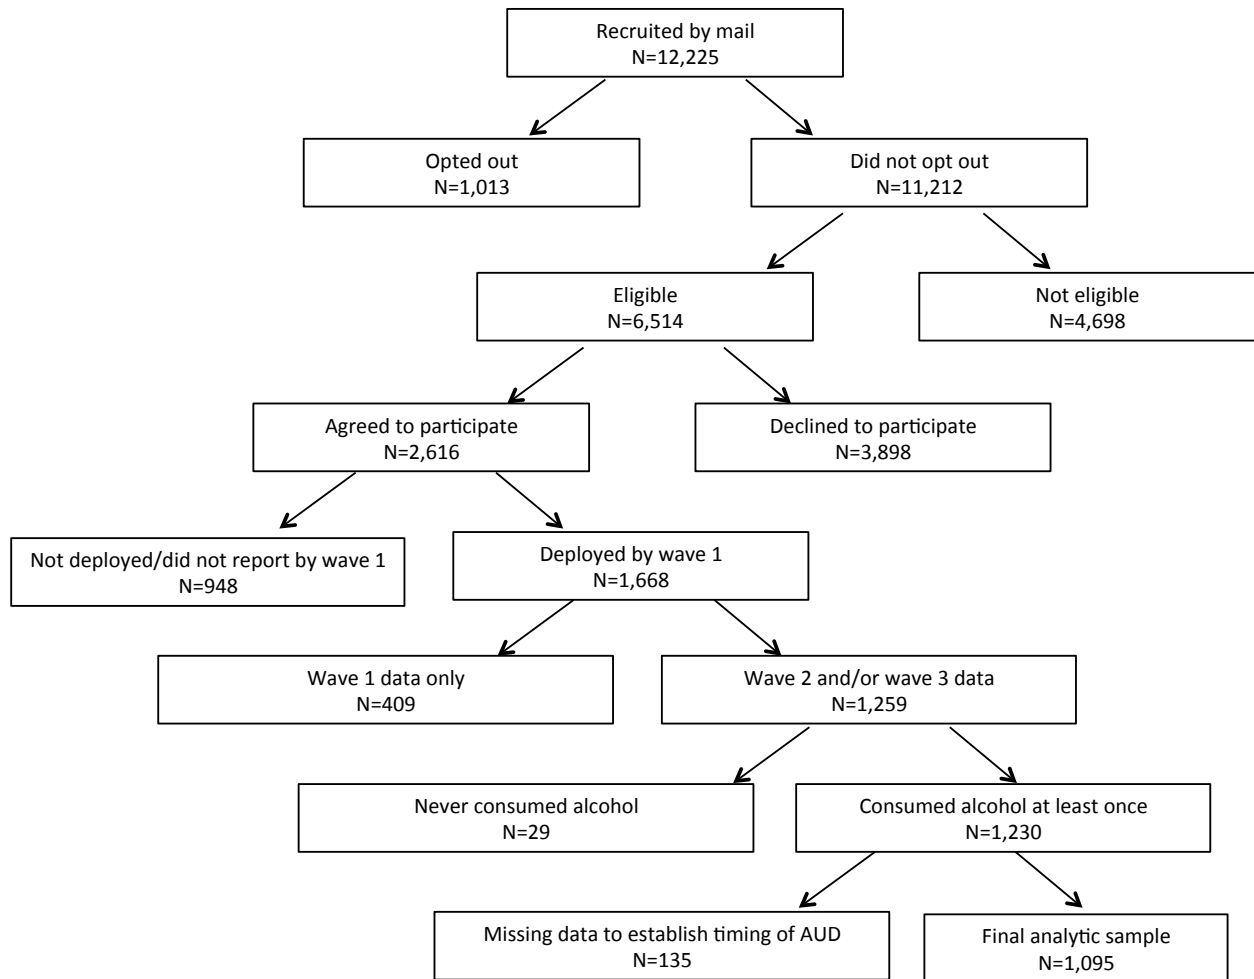

**Appendix 3.** Frequency of civilian stressors related to the most recent deployment

---

|                                                                                                              | <b>N</b> | <b>%</b> |
|--------------------------------------------------------------------------------------------------------------|----------|----------|
| Experienced mental illness personally or the mental illness of someone close to you                          | 106      | 9.73     |
| Had a parent who had a problem with drugs or alcohol                                                         | 4        | 0.37     |
| Had a family member other than a parent with a serious drug or alcohol problem                               | 10       | 0.92     |
| Been through a divorce or “break up” with a partner or significant other                                     | 156      | 14.30    |
| Lost your job                                                                                                | 53       | 4.85     |
| Been emotionally mistreated – for example, shamed, embarrassed, ignored, or repeatedly told you were no good | 63       | 5.77     |
| Seen or heard physical fighting between your parents or caregivers                                           | 5        | 0.46     |
| Experienced stressful legal problems – for example, being sued or suing someone else                         | 37       | 3.39     |
| Been unemployed and seeking employment for at least 3 months                                                 | 105      | 9.64     |
| Had serious financial problems                                                                               | 69       | 6.32     |
| Been robbed or had your home broken into                                                                     | 27       | 2.47     |
| Had problems getting access to adequate healthcare                                                           | 47       | 4.30     |

---

**Appendix 4.** Frequency of deployment related traumas and stressors

|                                                                                                                                                                | <b>N</b> | <b>%</b> |
|----------------------------------------------------------------------------------------------------------------------------------------------------------------|----------|----------|
| <b>Combat Traumas</b>                                                                                                                                          |          |          |
| Did you or members of your unit encounter land or water mines or booby traps?                                                                                  | 364      | 33.58    |
| Did you or members of your unit receive hostile incoming fire from small arms, artillery, rockets, mortars, bombs, or I.E.D.'s (Improvised Explosive Devices)? | 573      | 52.71    |
| Did you or members of your unit receive "friendly" incoming fire from small arms, artillery, rockets, mortars, or bombs?                                       | 106      | 9.93     |
| Were you in a vehicle, for example, a truck, tank, A.P.C. (Armored Personnel Carrier), helicopter, plane, or boat that was under fire?                         | 334      | 30.64    |
| Were you or members of your unit attacked by terrorists, insurgents, or civilians?                                                                             | 471      | 44.02    |
| Did your unit engage in battle in which it suffered casualties?                                                                                                | 204      | 18.84    |

|                                                                                                      |     |       |
|------------------------------------------------------------------------------------------------------|-----|-------|
| Did you personally witness someone from your unit or an ally unit being seriously wounded or killed? | 222 | 20.37 |
|------------------------------------------------------------------------------------------------------|-----|-------|

|                                                                                          |     |       |
|------------------------------------------------------------------------------------------|-----|-------|
| Did you personally witness soldiers from enemy troops being seriously wounded or killed? | 219 | 20.09 |
|------------------------------------------------------------------------------------------|-----|-------|

|                                                     |     |       |
|-----------------------------------------------------|-----|-------|
| Did you kill or think you killed someone in combat? | 116 | 11.12 |
|-----------------------------------------------------|-----|-------|

|                                            |    |      |
|--------------------------------------------|----|------|
| Were you injured or wounded during combat? | 35 | 3.20 |
|--------------------------------------------|----|------|

### **Post-battle Traumas**

|                                                                                          |     |       |
|------------------------------------------------------------------------------------------|-----|-------|
| Did you see enemy soldiers after they had been severely wounded or disfigured in combat? | 245 | 22.46 |
|------------------------------------------------------------------------------------------|-----|-------|

|                                                |     |       |
|------------------------------------------------|-----|-------|
| Did you see the bodies of dead enemy soldiers? | 210 | 19.34 |
|------------------------------------------------|-----|-------|

|                                                                           |     |       |
|---------------------------------------------------------------------------|-----|-------|
| Did you see civilians after they had been severely wounded or disfigured? | 278 | 25.57 |
|---------------------------------------------------------------------------|-----|-------|

|                                           |     |       |
|-------------------------------------------|-----|-------|
| Did you see the bodies of dead civilians? | 219 | 20.18 |
|-------------------------------------------|-----|-------|

|                                                                                               |     |       |
|-----------------------------------------------------------------------------------------------|-----|-------|
| Did you see Americans or allies after they had been severely wounded or disfigured in combat? | 295 | 27.06 |
|-----------------------------------------------------------------------------------------------|-----|-------|

|                                                     |     |       |
|-----------------------------------------------------|-----|-------|
| Did you see the bodies of dead Americans or allies? | 186 | 17.05 |
|-----------------------------------------------------|-----|-------|

### **Sexual Harassment**

|                                                                                       |     |       |
|---------------------------------------------------------------------------------------|-----|-------|
| Make crude and offensive sexual remarks directed at you, either publicly or privately | 178 | 16.26 |
|---------------------------------------------------------------------------------------|-----|-------|

|                                                                    |    |      |
|--------------------------------------------------------------------|----|------|
| Offer you some sort of reward or special treatment to take part in | 11 | 1.00 |
|--------------------------------------------------------------------|----|------|

sexual behavior

|                                                                                                                                                                           |    |      |
|---------------------------------------------------------------------------------------------------------------------------------------------------------------------------|----|------|
| Threaten you with some sort of retaliation for not being sexually cooperative for example, the threat of a negative review, physical violence, or to ruin your reputation | 7  | 0.64 |
| Make unwanted attempts to stroke or fondle you for example, stroking your leg or neck                                                                                     | 24 | 2.19 |
| Make unwanted attempts to have sex with you                                                                                                                               | 20 | 1.83 |
| Force you to have sex                                                                                                                                                     | 1  | 0.09 |

---

**Appendix 5.** Characteristics of Ohio National Guard members who have ever been deployed, wave 1, by alcohol use disorder status

|                                      | No alcohol disorder<br>waves 1–3 |       | Alcohol disorder<br>≥ 1 wave |       | <i>p</i> -value |
|--------------------------------------|----------------------------------|-------|------------------------------|-------|-----------------|
|                                      | No.                              | %     | No.                          | %     |                 |
| <b>Age</b>                           |                                  |       |                              |       | <0.01           |
| 17–24                                | 122                              | 13.72 | 54                           | 26.34 |                 |
| 25–34                                | 346                              | 38.92 | 85                           | 41.46 |                 |
| 35–44                                | 295                              | 33.18 | 51                           | 24.88 |                 |
| 45+                                  | 126                              | 14.17 | 15                           | 7.32  |                 |
| <b>Sex</b>                           |                                  |       |                              |       | 0.01            |
| Female                               | 97                               | 10.90 | 10                           | 4.88  |                 |
| Male                                 | 793                              | 89.10 | 195                          | 95.12 |                 |
| <b>Marital Status</b>                |                                  |       |                              |       | <0.01           |
| Currently divorced/separated/widowed | 97                               | 10.91 | 26                           | 12.68 |                 |
| Never married                        | 221                              | 24.86 | 85                           | 41.46 |                 |
| Currently married                    | 571                              | 64.23 | 94                           | 45.85 |                 |
| <b>Race</b>                          |                                  |       |                              |       | 0.06            |
| Non-Hispanic white                   | 783                              | 90.52 | 190                          | 95.00 |                 |
| Non-Hispanic black                   | 60                               | 6.94  | 5                            | 2.50  |                 |

|                                                |     |       |     |       |       |
|------------------------------------------------|-----|-------|-----|-------|-------|
| Other                                          | 22  | 2.54  | 5   | 2.50  |       |
| <b>Household Income</b>                        |     |       |     |       | 0.04  |
| ≥20,000 to 60,000                              | 441 | 50.69 | 118 | 58.71 |       |
| > 60,000                                       | 429 | 49.31 | 83  | 41.29 |       |
| <b>Education</b>                               |     |       |     |       | 0.09  |
| < High school, high school graduate or GED     | 176 | 19.78 | 43  | 20.98 |       |
| Some college or technical school               | 423 | 47.53 | 111 | 54.15 |       |
| College graduate or graduate degree            | 291 | 32.70 | 51  | 24.88 |       |
| <b>Family history of drug or alcohol abuse</b> |     |       |     |       | <0.01 |
| Yes                                            | 405 | 45.61 | 114 | 55.88 |       |
| No                                             | 483 | 54.39 | 90  | 44.12 |       |
| <b>Enlisted</b>                                |     |       |     |       | 0.02  |
| Yes                                            | 717 | 80.56 | 180 | 87.80 |       |
| No                                             | 173 | 19.44 | 25  | 12.20 |       |
| <b>Civilian stressors</b>                      |     |       |     |       | <0.01 |
| Any                                            | 280 | 31.46 | 113 | 55.12 |       |
| None                                           | 610 | 68.54 | 92  | 44.88 |       |
| <b>Peri-deployment events</b>                  |     |       |     |       |       |



|                          |     |       |     |       |      |
|--------------------------|-----|-------|-----|-------|------|
| <b>Combat</b>            |     |       |     |       | 0.02 |
| High                     | 281 | 31.64 | 82  | 40.00 |      |
| Medium                   | 225 | 25.34 | 56  | 27.32 |      |
| Low                      | 382 | 43.02 | 67  | 32.68 |      |
| <b>Post-Battle</b>       |     |       |     |       | 0.01 |
| High                     | 189 | 21.28 | 56  | 27.32 |      |
| Medium                   | 181 | 20.38 | 53  | 25.85 |      |
| Low                      | 518 | 58.33 | 96  | 46.83 |      |
| <b>Sexual Harassment</b> |     |       |     |       | 0.01 |
| Any                      | 139 | 15.62 | 47  | 23.93 |      |
| None                     | 751 | 84.38 | 158 | 77.07 |      |

---

**Appendix 6.** Civilian stressors associated with alcohol use disorders among Ohio National Guard members<sup>a</sup>

| <b>Civilian Stressor</b>                                                                                     | <b>Crude<sup>b</sup></b> | <b>Adjusted<sup>c</sup></b> |
|--------------------------------------------------------------------------------------------------------------|--------------------------|-----------------------------|
|                                                                                                              | <b>OR (95% CI)</b>       | <b>OR (95% CI)</b>          |
| Experienced mental illness personally or the mental illness of someone close to you                          | 0.98 (0.69–1.39)         | 0.85 (0.58–1.24)            |
| Had a parent who had a problem with drugs or alcohol                                                         | 1.37 (0.94–2.02)         | 1.15 (0.76–1.78)            |
| Had a family member other than a parent with a serious drug or alcohol problem                               | 1.52 (1.09–2.11)         | 1.36 (0.96–1.94)            |
| Been through a divorce or “break up” with a partner or significant other                                     | 1.02 (0.73–1.45)         | 1.02 (0.71–1.47)            |
| Lost your job                                                                                                | 0.87 (0.60–1.26)         | 0.83 (0.54–1.27)            |
| Been emotionally mistreated – for example, shamed, embarrassed, ignored, or repeatedly told you were no good | 1.09 (0.72–1.65)         | 0.93 (0.59–1.47)            |
| Seen or heard physical fighting between your parents or caregivers                                           | 1.19 (0.84–1.68)         | 0.95 (0.65–1.39)            |
| Experienced stressful legal problems – for example, being sued or suing someone else                         | 1.16 (0.76–1.77)         | 1.02 (0.65–1.61)            |
| Been unemployed and seeking employment for at least 3 months                                                 | 0.82 (0.57–1.20)         | 0.70 (0.46–1.07)            |
| Had serious financial problems                                                                               | 1.35 (0.94–1.93)         | 1.29 (0.86–1.93)            |
| Been Robbed or had your home broken into                                                                     | 1.63 (1.15–2.31)         | 1.48 (1.02–2.21)            |
| Had problems getting access to adequate healthcare                                                           | 2.07 (1.18–3.63)         | 1.97 (1.07–3.63)            |

<sup>a</sup>All models are adjusted for alcohol use disorder history at the prior wave, study wave, age, sex, and marital status

<sup>b</sup>Models include single civilian stressors

<sup>c</sup>All civilian stressors are included in the same model

**Appendix 7.** Combat traumatic events associated with alcohol use disorders among Ohio National Guard members<sup>a</sup>

| <b>Combat Traumas</b>                                                                                                                                          | <b>Crude<sup>b</sup></b> | <b>Adjusted<sup>c</sup></b> |
|----------------------------------------------------------------------------------------------------------------------------------------------------------------|--------------------------|-----------------------------|
|                                                                                                                                                                | <b>OR (95% CI)</b>       | <b>OR (95% CI)</b>          |
| Did you or members of your unit encounter land or water mines or booby traps?                                                                                  | 1.37 (0.98–1.91)         | 1.16 (0.72–1.84)            |
| Did you or members of your unit receive hostile incoming fire from small arms, artillery, rockets, mortars, bombs, or I.E.D.'s (Improvised Explosive Devices)? | 1.29 (0.93–1.79)         | 0.83 (0.46–1.50)            |
| Did you or members of your unit receive “friendly” incoming fire from small arms, artillery, rockets, mortars, or bombs?                                       | 0.98 (0.58–1.70)         | 0.80 (0.44–1.42)            |
| Were you in a vehicle, for example, a truck, tank, A.P.C. (Armored Personnel Carrier), helicopter, plane, or boat that was under fire?                         | 1.19 (0.84–1.67)         | 0.68 (0.40–1.16)            |
| Were you or members of your unit attacked by terrorists, insurgents, or civilians?                                                                             | 1.56 (1.12–2.18)         | 1.78 (0.99–3.20)            |
| Did your unit engage in battle in which it suffered casualties?                                                                                                | 1.32 (0.90–1.96)         | 1.13 (0.67–1.89)            |
| Did you personally witness someone from your unit or an ally unit being seriously wounded or killed?                                                           | 1.43 (0.97–2.08)         | 1.05 (0.63–1.75)            |
| Did you personally witness soldiers from enemy troops being seriously wounded or killed?                                                                       | 1.62 (1.11–2.34)         | 1.85 (1.06–3.23)            |
| Did you kill or think you killed someone in combat?                                                                                                            | 1.17 (0.72–1.89)         | 0.73 (0.39–1.39)            |
| Were you injured or wounded during combat?                                                                                                                     | 0.58 (0.22–1.56)         | 0.43 (0.14–1.32)            |

<sup>a</sup>All models are adjusted for alcohol use disorder history at the prior wave, study wave, age, sex, and marital status

<sup>b</sup>Models include single civilian stressors

<sup>c</sup>All civilian stressors are included in the same model

**Appendix 8.** Post-battle traumatic events associated with alcohol use disorders among Ohio National Guard members<sup>a</sup>

|                                                                                               | <b>Crude<sup>b</sup></b> | <b>Adjusted<sup>c</sup></b> |
|-----------------------------------------------------------------------------------------------|--------------------------|-----------------------------|
| <b>Post-battle Traumas</b>                                                                    | <b>OR (95% CI)</b>       | <b>OR (95% CI)</b>          |
| Did you see enemy soldiers after they had been severely wounded or disfigured in combat?      | 1.80 (1.26–2.58)         | 1.80 (1.05–3.06)            |
| Did you see the bodies of dead enemy soldiers?                                                | 1.57 (1.08–2.29)         | 1.05 (0.59–1.86)            |
| Did you see civilians after they had been severely wounded or disfigured?                     | 1.50 (1.05–2.14)         | 1.36 (0.83–2.23)            |
| Did you see the bodies of dead civilians?                                                     | 1.28 (0.87–1.88)         | 0.80 (0.47–1.37)            |
| Did you see Americans or allies after they had been severely wounded or disfigured in combat? | 1.17 (0.82–1.68)         | 0.68 (0.41–1.11)            |
| Did you see the bodies of dead Americans or allies?                                           | 1.53 (1.03–2.29)         | 1.39 (0.82–2.35)            |

<sup>a</sup>All models are adjusted for alcohol use disorder history at the prior wave, study wave, age, sex, and marital status

<sup>b</sup>Models include single civilian stressors

<sup>c</sup>All civilian stressors are included in the same model

**Appendix 9.** Sexual harassment events associated with alcohol use disorders among Ohio National Guard members<sup>a</sup>

|                                                                                                                                                                           | <b>Crude<sup>b</sup></b> | <b>Adjusted<sup>c</sup></b> |
|---------------------------------------------------------------------------------------------------------------------------------------------------------------------------|--------------------------|-----------------------------|
| <b>Sexual harassment</b>                                                                                                                                                  | <b>OR (95% CI)</b>       | <b>OR (95% CI)</b>          |
| Make crude and offensive sexual remarks directed at you, either publicly or privately                                                                                     | 1.47 (0.96–2.25)         | 1.43 (0.93–2.20)            |
| Offer you some sort of reward or special treatment to take part in sexual behavior                                                                                        | 2.65 (0.53–13.11)        | 1.81 (0.29–11.26)           |
| Threaten you with some sort of retaliation for not being sexually cooperative for example, the threat of a negative review, physical violence, or to ruin your reputation | 1.32 (0.11–14.89)        | 0.77 (0.06–10.03)           |
| Make unwanted attempts to stroke or fondle you for example, stroking your leg or neck                                                                                     | 1.14 (0.31–4.20)         | 0.59 (0.13–2.60)            |
| Make unwanted attempts to have sex with you                                                                                                                               | 2.46 (0.79–7.69)         | 2.44 (0.63–9.48)            |
| Force you to have sex                                                                                                                                                     | 0.02 (0.00–20.00)        | 0.02 (0.00–20.00)           |

<sup>a</sup>All models are adjusted for alcohol use disorder history at the prior wave, study wave, age, sex, and marital status

<sup>b</sup>Models include single civilian stressors

<sup>c</sup>All civilian stressors are included in the same model
